# Supplementary material
Source: publisher figshare collection journal article supplement (https://acs.figshare.com/ndownloader/files/9161782)
Supplement: Supplementary file 1 [file 9161782]

*Supporting Information for*

**An Improved Aromatic Substitution-rearrangement-based  
Ratiometric Fluorescent Cysteine-specific Probe and Its  
Application of Real-time Imaging under Oxidative Stress in Living  
Zebrafish**

Longwei He, Xueling Yang, Kaixin Xu and Weiying Lin<sup>\*</sup>

<sup>a</sup>Institute of Fluorescent Probes for Biological Imaging, School of Chemistry and Chemical Engineering, School of Materials Science and Engineering, University of Jinan, Shandong 250022, P.R. China

E-mail: [weiylinglin2013@163.com](mailto:weiylinglin2013@163.com)

## Table of contents

|                        | Page |
|------------------------|------|
| 1. Instruments.....    | S3   |
| 2. Scheme S1.....      | S4   |
| 3. Figures S1.....     | S4   |
| 4. Figures S2-3.....   | S5   |
| 5. Figures S4-6.....   | S6   |
| 6. Figures S7-8.....   | S7   |
| 7. Figures S9-10.....  | S8   |
| 8. Figures S11-12..... | S8   |
| 9. Figures S13.....    | S8   |

## **Instruments**

Mass spectra were performed using an LCQ Advantage ion trap mass spectrometer from Thermo Finnigan; High resolution mass spectrometric (HRMS) analyses were measured on a Finnigan MAT 95 XP spectrometer; NMR spectra were recorded on an INOVA-400 spectrometer, using TMS as an internal standard; Electronic absorption spectra were obtained on a LabTech UV Power spectrometer; Photoluminescent spectra were recorded with a HITACHI F4600 fluorescence spectrophotometer; The optical density was measured by a Thermo Scientific Multiskan FC microplate reader in cytotoxicity assay; The fluorescence imaging of cells was performed with OLYMPUS FV1000 (TY1318) confocal microscopy; The pH measurements were carried out on a Mettler-Toledo Delta 320 pH meter; TLC analysis was performed on silica gel plates and column chromatography was conducted over silica gel (mesh 200–300), both of which were obtained from the Qingdao Ocean Chemicals.

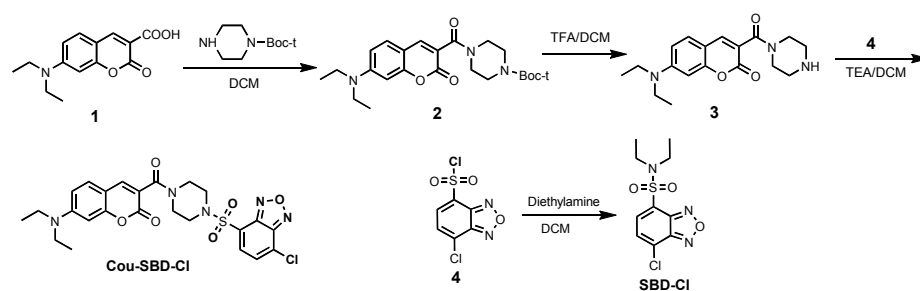

**Scheme S1** Synthetic route of probe **Cou-SBD-Cl** and intermediate **SBD-Cl**.

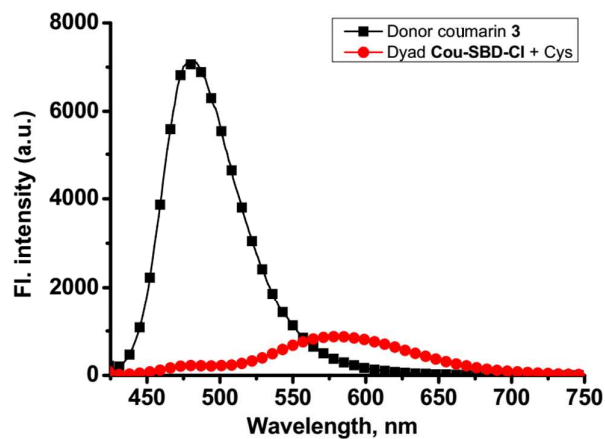

**Figure S1** Emission spectra of donor coumarin **3** (10  $\mu\text{M}$ , blacks square) and dyad **Cou-SBD-Cl** (10  $\mu\text{M}$ ) with 100 equiv. of Cys (red circle) in aqueous solution (pH 7.4, 25 mM PBS buffer solution containing 20% DMF).

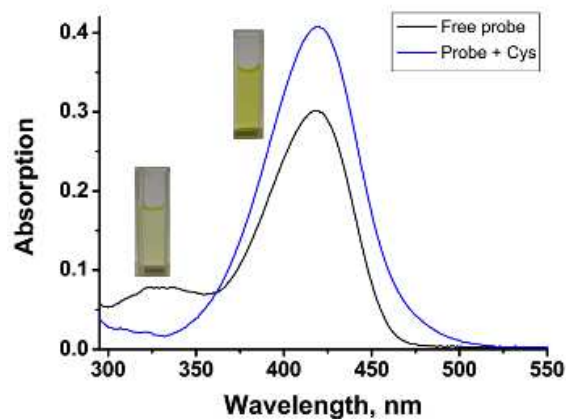

**Figure S2** Absorption spectra of **Cou-SBD-Cl** (10  $\mu$ M) with 100 equiv. of Cys in aqueous solution (pH 7.4, 25 mM PBS buffer solution containing 20% DMF). Inset: the visual colour of probe **Cou-SBD-Cl** in the absence (left) or presence (right) of Cys.

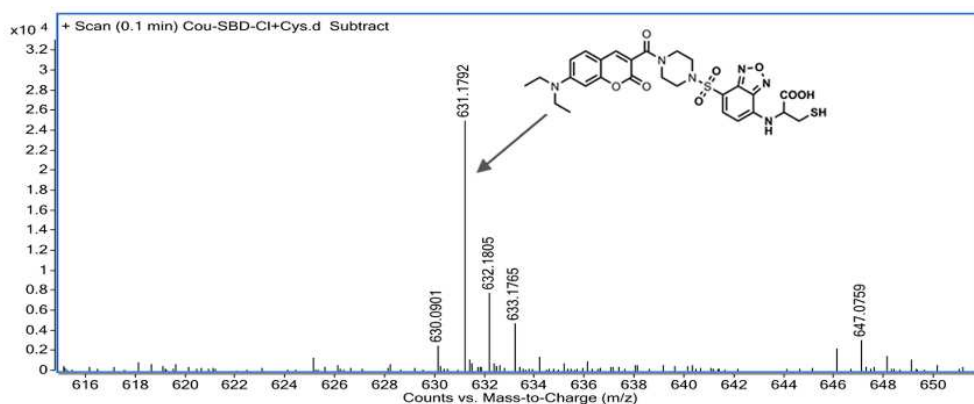

**Figure S3** The high resolution mass spectrum of **Cou-SBD-Cl** in the presence of Cys in aqueous PBS solution.

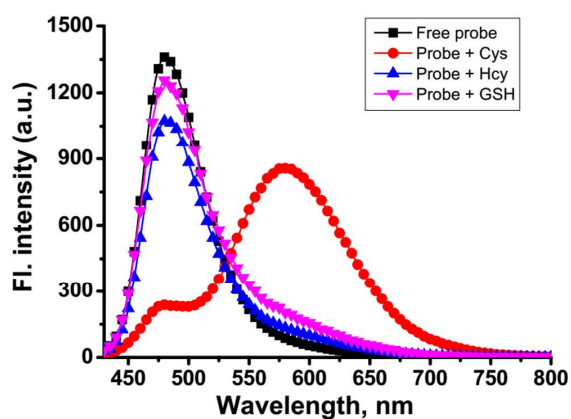

**Figure S4** The emission spectra of **Cou-SBD-Cl** in the absence or presence of 1 mM for Cys, Hcy, or GSH in aqueous PBS solution (pH 7.4, 25 mM PBS buffer solution containing 20% DMF). Incubation time: 60 min. Excitation: 450 nm.

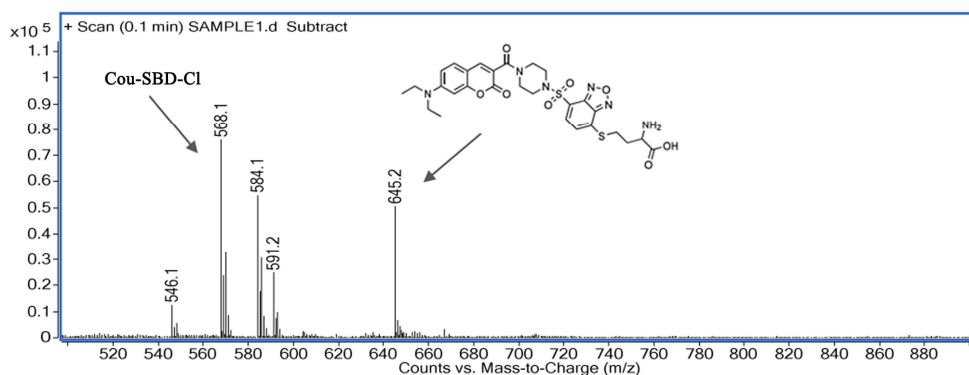

**Figure S5** MS (ESI) of **Cou-SBD-Cl** in the presence of Hcy in aqueous PBS solution.

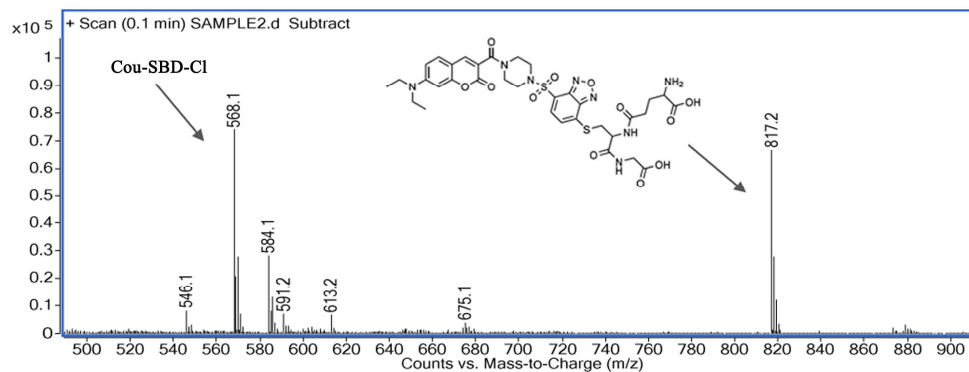

**Figure S6** MS (ESI) of **Cou-SBD-Cl** in the presence of GSH in aqueous PBS solution.

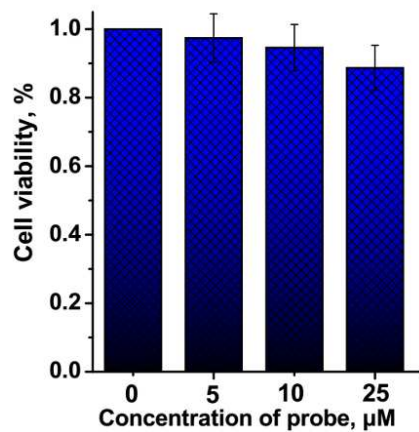

**Figure S7.** Cytotoxicity of probe **Cou-SBD-Cl** (5, 10, 25  $\mu\text{M}$ ) evaluated by the standard MTT assay. The cells were incubated with the probe for 24 h.

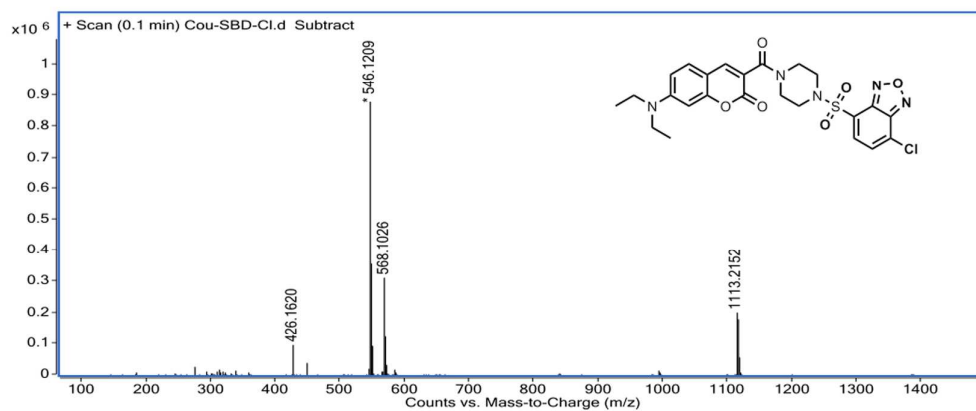

**Figure S8** HRMS (ESI) of probe **Cou-SBD-Cl**, calcd for  $\text{C}_{24}\text{H}_{24}\text{ClN}_5\text{O}_6\text{S}$  ( $[\text{M}+1]^+$ ): 546.1209. Found 546.1209.





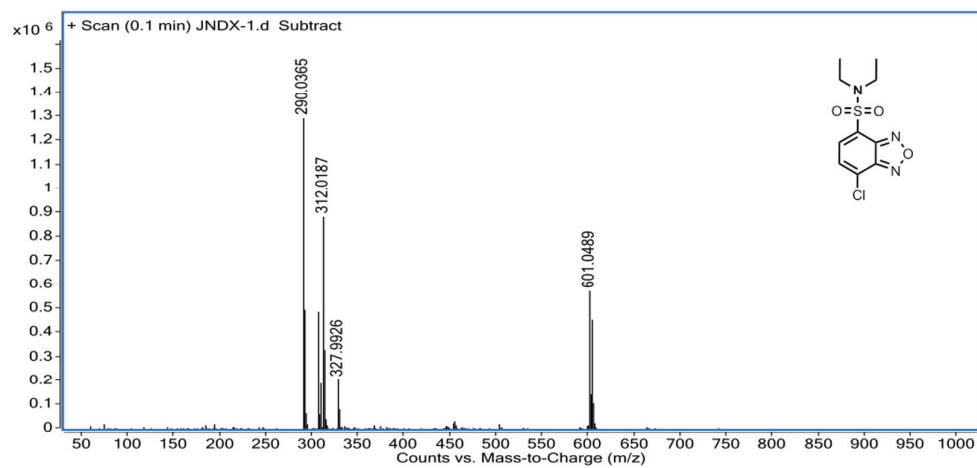

**Figure S11** HRMS (ESI) of intermediate **SBD-Cl**, calcd for C<sub>10</sub>H<sub>13</sub>ClN<sub>3</sub>O<sub>3</sub>S ([M+1]<sup>+</sup>): 290.0361. Found 290.0365.

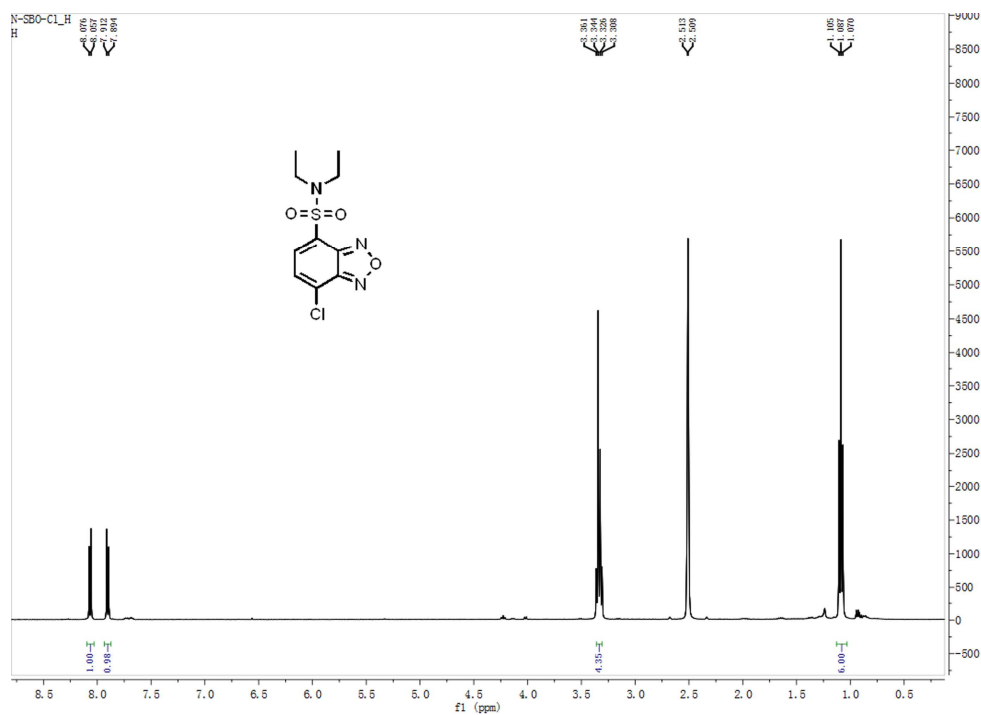

**Figure S12** <sup>1</sup>H NMR spectrum of intermediate **SBD-Cl** in *d*<sub>6</sub>-DMSO.

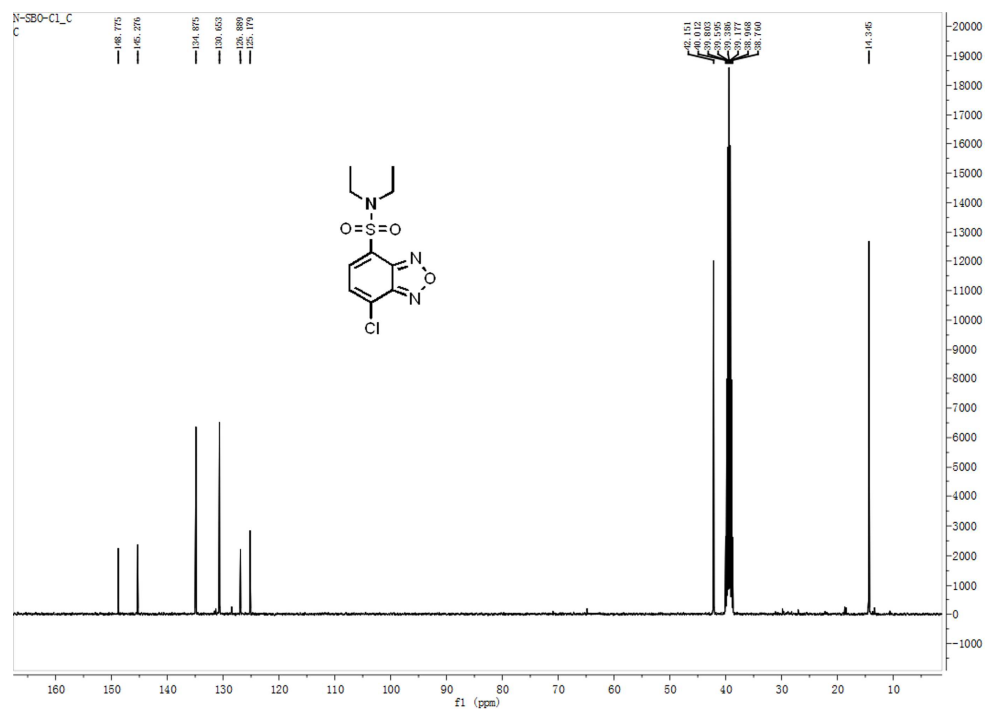

**Figure S13**  $^{13}\text{C}$  NMR spectrum of intermediate **SBD-Cl** in  $d_6$ -DMSO.
